# Supplementary material for: Apolipoprotein E Genotype e2: Neuroprotection and Its Limits
Source: PubMed Central journal article supplement (PMC9329577; doi:10.3389/fnagi.2022.919712), 2022-07-14
Supplement: Table_1.pdf [file Table_1.pdf]

**Supplemental Table 1.** Summary of findings on APOE  $\epsilon 2$  and Cognition

| <b>Cross-Sectional Findings</b> |                   |            |                                                                                                                         |                                                                                      |                                                                                                                                                         |                         |                         |                       |                            |                       |                       |                 |               |
|---------------------------------|-------------------|------------|-------------------------------------------------------------------------------------------------------------------------|--------------------------------------------------------------------------------------|---------------------------------------------------------------------------------------------------------------------------------------------------------|-------------------------|-------------------------|-----------------------|----------------------------|-----------------------|-----------------------|-----------------|---------------|
| <b>Study</b>                    | <b>Population</b> | <b>Age</b> | <b>N/ <math>\epsilon 2</math> n</b>                                                                                     | <b>Predictor</b>                                                                     | <b>Comparisons</b>                                                                                                                                      | <b>Global Cognition</b> | <b>Processing Speed</b> | <b>Working Memory</b> | <b>Executive Functions</b> | <b>Visual-Spatial</b> | <b>Verbal Fluency</b> | <b>Language</b> | <b>Memory</b> |
| Sinclair et al. (2017)(61)      | UK                | 23-67      | 114/33                                                                                                                  | $\epsilon 2/\epsilon 2$ ,<br>$\epsilon 2/\epsilon 3$                                 | $\epsilon 3/\epsilon 3$                                                                                                                                 |                         | NS                      | O                     | O                          |                       |                       | NS              | O             |
| Marioni et al (2016)(64)        | UK (GS:SFHS)      | 35-65      | 18337/<br>2716 (111<br>$\epsilon 2/\epsilon 2$ ,<br>2194<br>$\epsilon 2/\epsilon 3$ ; 411<br>$\epsilon 2/ \epsilon 4$ ) | $\epsilon 2/\epsilon 2$ ,<br>$\epsilon 2/\epsilon 3$ , $\epsilon 2/$<br>$\epsilon 4$ | Within $\epsilon 2$<br>groups,<br>$\epsilon 3/\epsilon 3$ , and<br>$\epsilon 4$ ( $\epsilon 3/\epsilon 4$ ,<br>$\epsilon 4/\epsilon 4$ ),<br>separately |                         | NS                      |                       |                            |                       | NS                    |                 | NS            |

|                                   |                          |                           |                |                                                      |                                                                                                                                                           |           |           |  |           |  |           |          |           |
|-----------------------------------|--------------------------|---------------------------|----------------|------------------------------------------------------|-----------------------------------------------------------------------------------------------------------------------------------------------------------|-----------|-----------|--|-----------|--|-----------|----------|-----------|
| Lancaster<br>et al.<br>(2017)(63) | UK                       | 45-55                     | 66/16          | $\epsilon_2/\epsilon_2$ ,<br>$\epsilon_2/\epsilon_3$ | $\epsilon_3/\epsilon_3$                                                                                                                                   |           | <b>X</b>  |  |           |  |           |          |           |
| Greenwood<br>et al.<br>(2000)(62) | USA                      | 50+,<br>“middle<br>-aged” | 97/11          | $\epsilon_2/\epsilon_2$ ,<br>$\epsilon_2/\epsilon_3$ | $\epsilon_3/\epsilon_3$ and $\epsilon_4$<br>group<br>( $\epsilon_2/\epsilon_4$ ,<br>$\epsilon_3/\epsilon_4$ ,<br>$\epsilon_4/\epsilon_4$ ),<br>separately |           | <b>NS</b> |  |           |  |           |          |           |
| Allred et<br>al.<br>(2016)(65)    | USA<br>(DHS MIND)        | Mean<br>65.9              | 1217/154       | $\epsilon_2/\epsilon_2$ ,<br>$\epsilon_2/\epsilon_3$ | $\epsilon_3/\epsilon_3$                                                                                                                                   | <b>X</b>  | <b>NS</b> |  | <b>NS</b> |  |           | <b>X</b> | <b>X</b>  |
| Alfred et<br>al.<br>(2014)(66)    | UK<br>(HALCyon,<br>NCDS) | 44-90+                    | 23916/308<br>5 | $\epsilon_2/\epsilon_2$ ,<br>$\epsilon_2/\epsilon_3$ | $\epsilon_3/\epsilon_3$                                                                                                                                   |           | <b>NS</b> |  |           |  | <b>NS</b> |          | <b>NS</b> |
| Shin et al.<br>(2014)(139<br>)    | S. Korea<br>(The         | 45-74                     | 10371          | $\epsilon_2/\epsilon_2$ ,<br>$\epsilon_2/\epsilon_3$ | $\epsilon_3/\epsilon_3$                                                                                                                                   | <b>NS</b> |           |  |           |  |           |          |           |

|                               |                              |               |        |                                                     |                                                                                                                    |          |          |  |          |  |  |          |          |
|-------------------------------|------------------------------|---------------|--------|-----------------------------------------------------|--------------------------------------------------------------------------------------------------------------------|----------|----------|--|----------|--|--|----------|----------|
|                               | Namwon<br>Study)             |               |        |                                                     |                                                                                                                    |          |          |  |          |  |  |          |          |
| Helkala et al.<br>(1995)(140) | Finnish                      | Mean<br>73    | 916/76 | $\epsilon_2/\epsilon_2,$<br>$\epsilon_2/\epsilon_3$ | $\epsilon_2/\epsilon_4, \epsilon_3/\epsilon_4,$<br>$\epsilon_4/\epsilon_4$                                         |          |          |  |          |  |  | <b>O</b> | <b>O</b> |
| Deary et al.<br>(2004)(70)    | UK (Lothian<br>Birth Cohort) | Mean<br>79    | 462/66 | $\epsilon_2/\epsilon_3$                             | $\epsilon_3/\epsilon_3$                                                                                            |          |          |  |          |  |  |          | <b>O</b> |
| Groot<br>(2018)*(90)          | Netherlands                  | Mean<br>69.2  | 180/36 | $\epsilon_2/\epsilon_3$                             | $\epsilon_3/\epsilon_3$ and $\epsilon_4$<br>( $\epsilon_3/\epsilon_4,$<br>$\epsilon_4/\epsilon_4$ ),<br>separately |          | <b>X</b> |  | <b>X</b> |  |  | <b>X</b> | <b>O</b> |
| Gong<br>(2020)(80)            | USA (ADNI)                   | Mean<br>72.05 | 177/32 | $\epsilon_2/\epsilon_2,$<br>$\epsilon_2/\epsilon_3$ | $\epsilon_3/\epsilon_3$ and $\epsilon_4$<br>( $\epsilon_3/\epsilon_4,$<br>$\epsilon_4/\epsilon_4$ ),<br>separately | <b>O</b> |          |  | <b>O</b> |  |  |          | <b>O</b> |

|                              |                                  |                     |                                  |                |                  |                                         |                         |                         |                       |                            |                       |                         |                 |               |
|------------------------------|----------------------------------|---------------------|----------------------------------|----------------|------------------|-----------------------------------------|-------------------------|-------------------------|-----------------------|----------------------------|-----------------------|-------------------------|-----------------|---------------|
| Conejero-Goldberg (2014)(21) | USA (ADNI)                       |                     | Mean age 75                      | 31/5           | ε2/ε2, ε2/ε3     | ε3/ε3 and ε4 (ε3/ε4, ε4/ε4), separately |                         |                         |                       | NS                         |                       |                         |                 | NS            |
| Kantarci (2012)(82)          | USA (Mayo Clinic Study of Aging) |                     | 79 (76-83)                       | 51/408         | ε2/ε2, ε2/ε3     | ε3/ε3 and ε4 (ε3/ε4, ε4/ε4), separately | X                       |                         |                       |                            |                       |                         |                 |               |
| Bennett (2009)(67)           | USA (ROS and MAP)                |                     | mean 89.3 for AD; 85.1 for No AD | 74/536         | ε2/ε2, ε2/ε3     | ε3/ε3                                   | NS                      | NS                      | NS                    | NS                         | NS                    | NS                      | NS              | NS            |
| <b>Longitudinal Findings</b> |                                  |                     |                                  |                |                  |                                         |                         |                         |                       |                            |                       |                         |                 |               |
| <b>Study</b>                 | <b>Population</b>                | <b>F/U Duration</b> | <b>Age at (Baseline in y)</b>    | <b>N/ ε2 n</b> | <b>Predictor</b> | <b>Comparisons</b>                      | <b>Global Cognition</b> | <b>Processing Speed</b> | <b>Working Memory</b> | <b>Executive Functions</b> | <b>Visual-Spatial</b> | <b>Semantic Fluency</b> | <b>Language</b> | <b>Memory</b> |

|                             |                             |               |       |                  |                                                      |                                                                                                                     |    |    |    |    |  |  |  |    |
|-----------------------------|-----------------------------|---------------|-------|------------------|------------------------------------------------------|---------------------------------------------------------------------------------------------------------------------|----|----|----|----|--|--|--|----|
| Bunce et al. (2014)(141)    | Australia (PATH)            | 8 y           | 20-64 | 2013/35          | $\epsilon_2/\epsilon_2$ ,<br>$\epsilon_2/\epsilon_3$ | $\epsilon_3/\epsilon_4$ , $\epsilon_4/\epsilon_4$                                                                   |    | NS | NS | NS |  |  |  | NS |
| Chiang et al. (2010)(93)    | USA (ADNI)                  | 2 y           | 55-90 | 134/27           | $\epsilon_2/\epsilon_2$ ,<br>$\epsilon_2/\epsilon_3$ | $\epsilon_3/\epsilon_3$                                                                                             | NS |    |    |    |  |  |  | NS |
| Reas et al. (2019)(142)     | USA (Rancho Bernardo Study) | Mean 7 y      | 44-99 | 1393/195         | $\epsilon_2/\epsilon_3$                              | $\epsilon_3/\epsilon_3$ and $\epsilon_4$<br>( $\epsilon_3/\epsilon_4$ ,<br>$\epsilon_4/\epsilon_4$ ),<br>separately | NS |    |    | O  |  |  |  | NS |
| Greenwood et al. (2000)(62) | USA (BIOCARD)               | 3- and 12- mo | 33-85 | 139/not reported | $\epsilon_2/\epsilon_2$ ,<br>$\epsilon_2/\epsilon_3$ | $\epsilon_3/\epsilon_3$ and $\epsilon_4$<br>( $\epsilon_3/\epsilon_4$ ,<br>$\epsilon_4/\epsilon_4$ ),<br>separately |    | O  |    |    |  |  |  |    |

|                                 |                      |       |       |                                                                                                       |                                                                                       |                                                                                                                     |           |           |           |  |  |  |           |  |          |
|---------------------------------|----------------------|-------|-------|-------------------------------------------------------------------------------------------------------|---------------------------------------------------------------------------------------|---------------------------------------------------------------------------------------------------------------------|-----------|-----------|-----------|--|--|--|-----------|--|----------|
| Blair et al.<br>(2005)(77)      | USA (ARIC)           | 6 y   | 47-68 | 7895/<br>1401                                                                                         | $\epsilon_2/\epsilon_2$ ,<br>$\epsilon_2/\epsilon_3$                                  | $\epsilon_3/\epsilon_3$                                                                                             |           | <b>O</b>  |           |  |  |  | <b>NS</b> |  | <b>O</b> |
| Rajan et al.<br>(2019)(73)      | USA                  | 8.9 y | 65+   | 5807/<br>48 $\epsilon_2/\epsilon_2$ ,<br>782 $\epsilon_2/\epsilon_3$ ,<br>203 $\epsilon_2/\epsilon_4$ | $\epsilon_2/\epsilon_2$ vs.<br>$\epsilon_2/\epsilon_3$ vs.<br>$\epsilon_2/\epsilon_4$ | $\epsilon_3/\epsilon_3$                                                                                             | <b>O</b>  | <b>NS</b> |           |  |  |  |           |  | <b>O</b> |
| Staehelin et al.<br>(1999)(72)  | Switzerland<br>(IDA) | 2 y   | 65+   | 232/<br>62                                                                                            | $\epsilon_2/\epsilon_2$ ,<br>$\epsilon_2/\epsilon_3$ ,<br>$\epsilon_2/\epsilon_4$     | $\epsilon_3/\epsilon_3$ and $\epsilon_4$<br>( $\epsilon_3/\epsilon_4$ ,<br>$\epsilon_4/\epsilon_4$ ),<br>separately | <b>O</b>  | <b>O</b>  |           |  |  |  |           |  | <b>O</b> |
| Yaffe et al.<br>(1997)(143<br>) | USA (SOP)            | 6 y   | 65+   | 1750/259                                                                                              | $\epsilon_2/\epsilon_2$ ,<br>$\epsilon_2/\epsilon_3$                                  | $\epsilon_3/\epsilon_3$ , $\epsilon_3/\epsilon_4$ ,<br>$\epsilon_4/\epsilon_4$                                      | <b>NS</b> | <b>O</b>  | <b>NS</b> |  |  |  |           |  |          |



|                                      |                                                    |            |                   |        |                                                                                   |                                                                                                                     |          |           |           |          |           |  |           |          |
|--------------------------------------|----------------------------------------------------|------------|-------------------|--------|-----------------------------------------------------------------------------------|---------------------------------------------------------------------------------------------------------------------|----------|-----------|-----------|----------|-----------|--|-----------|----------|
| Kim et al.<br>(2017)(100)            | S. Korea/subcortical vascular cognitive impairment | 3 y        | 73+               | 72/11  | $\epsilon_2/\epsilon_2$ ,<br>$\epsilon_2/\epsilon_3$                              | $\epsilon_3/\epsilon_3$                                                                                             | <b>O</b> |           |           |          |           |  |           |          |
| Wilson et al.<br>(2002)(68)          | USA (Religious Orders Study)                       | $\leq 8$ y | Mean age 74       | 669/86 | $\epsilon_2/\epsilon_2$ ,<br>$\epsilon_2/\epsilon_3$                              | $\epsilon_3/\epsilon_3$                                                                                             |          | <b>NS</b> | <b>NS</b> |          | <b>NS</b> |  |           | <b>O</b> |
| Bonner-Jackson et al.<br>(2012)(146) | USA (ADNI)                                         | 2 y        | 74+               | 795/53 | $\epsilon_2/\epsilon_2$ ,<br>$\epsilon_2/\epsilon_3$                              | $\epsilon_3/\epsilon_3$ , $\epsilon_3/\epsilon_4$ ,<br>$\epsilon_4/\epsilon_4$                                      | <b>O</b> | <b>NS</b> |           | <b>O</b> |           |  | <b>NS</b> | <b>O</b> |
| Martins et al.<br>(2005)(79)         | UK (OPTIMA Study); AD patients                     | 6-month    | Mean age mid-70's | 218/24 | $\epsilon_2/\epsilon_2$ ,<br>$\epsilon_2/\epsilon_3$ ,<br>$\epsilon_2/\epsilon_4$ | $\epsilon_3/\epsilon_3$ and $\epsilon_4$<br>( $\epsilon_3/\epsilon_4$ ,<br>$\epsilon_4/\epsilon_4$ ),<br>separately | <b>O</b> |           |           |          |           |  |           |          |

|                             |                                                  |       |           |                                               |                                                                                                              |                                                                                                                                                                                                               |          |  |  |           |  |  |  |  |           |
|-----------------------------|--------------------------------------------------|-------|-----------|-----------------------------------------------|--------------------------------------------------------------------------------------------------------------|---------------------------------------------------------------------------------------------------------------------------------------------------------------------------------------------------------------|----------|--|--|-----------|--|--|--|--|-----------|
| Hyman et al. (1995)(36)     | USA (Iowa 65+ Rural Health Study of the Elderly) | 4-7 y | Mean 79   | 1899/296                                      | $\epsilon_2/\epsilon_2$ ,<br>$\epsilon_2/\epsilon_3$ ,<br>$\epsilon_2/\epsilon_4$                            | $\epsilon_3/\epsilon_3$ , $\epsilon_3/\epsilon_4$ ,<br>$\epsilon_4/\epsilon_4$                                                                                                                                |          |  |  |           |  |  |  |  | <b>O</b>  |
| Oveisgharan et al. (2018)   | USA (ROP and MAP)                                | 7-8 y | Mean 78.3 | 2151/<br>301 (46<br>$\epsilon_2/\epsilon_4$ ) | $\epsilon_2/\epsilon_4$ , $\epsilon_2$<br>groups<br>( $\epsilon_2/\epsilon_2$ ,<br>$\epsilon_2/\epsilon_3$ ) | $\epsilon_3/\epsilon_3$ , $\epsilon_2$<br>groups<br>( $\epsilon_2/\epsilon_2$ ,<br>$\epsilon_2/\epsilon_3$ ), $\epsilon_4$<br>groups<br>$\epsilon_3/\epsilon_4$ ,<br>$\epsilon_4/\epsilon_4$ ),<br>separately | <b>O</b> |  |  |           |  |  |  |  |           |
| Schiepers et al. (2012)(71) | UK (Lothian Birth Cohort)                        | 8 y   | 79-87     | 501/78                                        | $\epsilon_2/\epsilon_2$ ,<br>$\epsilon_2/\epsilon_3$ ,<br>$\epsilon_2/\epsilon_4$                            | $\epsilon_3/\epsilon_3$ , $\epsilon_3/\epsilon_4$ ,<br>$\epsilon_4/\epsilon_4$                                                                                                                                |          |  |  | <b>NS</b> |  |  |  |  | <b>NS</b> |

|                                    |                                          |               |       |          |                                                     |                         |          |  |  |  |  |  |  |  |  |
|------------------------------------|------------------------------------------|---------------|-------|----------|-----------------------------------------------------|-------------------------|----------|--|--|--|--|--|--|--|--|
| Lindahl-<br>Jacobson<br>(2013)(69) | Denmark<br>(Danish 1905<br>Birth Cohort) | 2y, 5y,<br>7y | 92-93 | 1651/163 | $\epsilon 2/\epsilon 2,$<br>$\epsilon 2/\epsilon 3$ | $\epsilon 3/\epsilon 3$ | <b>O</b> |  |  |  |  |  |  |  |  |
|------------------------------------|------------------------------------------|---------------|-------|----------|-----------------------------------------------------|-------------------------|----------|--|--|--|--|--|--|--|--|

**O**=protective role of APOE e2; **Δ**= marginally significant; **NS**= Non-significant association between APOE e2 and cognition; **X**= adverse role of APOE e2

**Supplemental Table 2.** Summary of Findings on APOE  $\epsilon 2$  and Imaging Biomarkers

| Cross-Sectional Findings     |             |                     |                   |                                                |                                                                                                  |                    |            |          |                  |                   |              |     |
|------------------------------|-------------|---------------------|-------------------|------------------------------------------------|--------------------------------------------------------------------------------------------------|--------------------|------------|----------|------------------|-------------------|--------------|-----|
| Study                        | Population  | Participant Age (y) | N/ $\epsilon 2$ n | Predictor                                      | Comparison                                                                                       | Cortical Thickness | Ventricles | Regional | Hippocampal Vol. | Amyloid B plaques | WM integrity | WMH |
| Alexopoulos (2011)(147)      | Germany     | 24.7                | 33/17             | $\epsilon 2/\epsilon 2, \epsilon 2/\epsilon 3$ | $\epsilon 3/\epsilon 3, \epsilon 3/\epsilon 4$                                                   |                    |            |          | O                |                   |              |     |
| Fennema-Notestine (2011)(86) | USA (VETSA) | ages 51-59          | 482/67            | $\epsilon 2/\epsilon 3$                        | $\epsilon 3/\epsilon 3$                                                                          |                    |            | O        | $\Delta$         |                   |              |     |
| Konishi (2016)(148)          | Canada      | 18-37               | 37/5              | $\epsilon 2/\epsilon 2, \epsilon 2/\epsilon 3$ | $\epsilon 3/\epsilon 3$ and $\epsilon 4$ ( $\epsilon 3/\epsilon 4$ and $\epsilon 4/\epsilon 4$ ) |                    |            |          | O                |                   |              |     |

|                        |                                                      |                                                 |        |                                                                                                  |                                                                                                      |                                                                                                     |  |           |  |  |          |          |
|------------------------|------------------------------------------------------|-------------------------------------------------|--------|--------------------------------------------------------------------------------------------------|------------------------------------------------------------------------------------------------------|-----------------------------------------------------------------------------------------------------|--|-----------|--|--|----------|----------|
| Raz<br>(2012)(109)     | USA                                                  | 44-77 (mean<br>58.89)                           | 144/19 | $\epsilon_2/\epsilon_2$ , $\epsilon_2/\epsilon_3$                                                | $\epsilon_3/\epsilon_3$ and<br>$\epsilon_3/\epsilon_4$ , $\epsilon_4/\epsilon_4$                     |                                                                                                     |  |           |  |  |          | <b>X</b> |
| Bunce<br>(2012)(92)    | Australia<br>(PATH)                                  | Middle-aged<br>(44-48); Older<br>adults (64-68) | 627/86 | $\epsilon_2/\epsilon_2$ , $\epsilon_2/\epsilon_3$                                                | $\epsilon_3/\epsilon_3$ and $\epsilon_4$<br>( $\epsilon_3/\epsilon_4$ ,<br>$\epsilon_4/\epsilon_4$ ) |                                                                                                     |  | <b>NS</b> |  |  |          |          |
| Morris<br>(2010)(95)   | USA                                                  |                                                 | 45-88  | 241/ 3<br>$\epsilon_2/\epsilon_2$ ; 26<br>$\epsilon_2/\epsilon_3$ ,<br>5 $\epsilon_2/\epsilon_4$ | $\epsilon_2/\epsilon_2$ , $\epsilon_2/\epsilon_3$ ,<br>$\epsilon_2/\epsilon_4$                       | $\epsilon_3/$<br>$\epsilon_3$ ,<br>$\epsilon_3/$<br>$\epsilon_4$ ,<br>$\epsilon_4/$<br>$\epsilon_4$ |  |           |  |  | <b>O</b> |          |
| Westlye<br>(2012)(113) | Norway<br>(Norwegian<br>Cognitive<br>Neuro Genetics) | Mean 47.6 (21-<br>69 y)                         | 203/30 | $\epsilon_2/\epsilon_3$                                                                          | $\epsilon_3/\epsilon_3$ and<br>$\epsilon_3/\epsilon_4$                                               |                                                                                                     |  |           |  |  |          | <b>X</b> |

|                        |                                                     |                    |                         |                                                |                                                                                                     |           |           |           |                            |  |  |          |
|------------------------|-----------------------------------------------------|--------------------|-------------------------|------------------------------------------------|-----------------------------------------------------------------------------------------------------|-----------|-----------|-----------|----------------------------|--|--|----------|
| Schmidt<br>(1997)(110) | Austria (Austria<br>Stroke<br>Prevention<br>Study)  | 50-75              | 280/34                  | $\epsilon_2/\epsilon_3$                        | $\epsilon_3/\epsilon_3$                                                                             |           |           |           |                            |  |  | <b>X</b> |
| Salvado<br>(2019)(106) | Spain;<br>Alzheimer and<br>Families<br>(ALFA) Study | 51-64 (mean<br>58) | 109/56<br>1             | $\epsilon_2/\epsilon_3$                        | $\epsilon_3/\epsilon_3$                                                                             |           |           |           |                            |  |  | <b>O</b> |
| Liu<br>(2010)*(83)     | Europe                                              | 65+                | 105/12<br><i>in HC</i>  | $\epsilon_2/\epsilon_2, \epsilon_2/\epsilon_3$ | $\epsilon_3/\epsilon_3$ and $\epsilon_4$<br>( $\epsilon_3/\epsilon_4,$<br>$\epsilon_4/\epsilon_4$ ) | <b>NS</b> | <b>NS</b> | <b>NS</b> | <b>NS</b>                  |  |  |          |
|                        |                                                     |                    | 109/10<br><i>in MCI</i> | $\epsilon_2/\epsilon_2, \epsilon_2/\epsilon_3$ | $\epsilon_3/\epsilon_3$ and $\epsilon_4$<br>( $\epsilon_3/\epsilon_4,$<br>$\epsilon_4/\epsilon_4$ ) | <b>O</b>  | <b>O</b>  | <b>O</b>  | <b><math>\Delta</math></b> |  |  |          |

|                                    |             |               |                        |                                                |                                                                                                                            |          |    |          |          |  |   |   |
|------------------------------------|-------------|---------------|------------------------|------------------------------------------------|----------------------------------------------------------------------------------------------------------------------------|----------|----|----------|----------|--|---|---|
|                                    |             |               | 115/4<br><i>in AD</i>  | $\epsilon_2/\epsilon_2, \epsilon_2/\epsilon_3$ | $\epsilon_3/\epsilon_3$ and $\epsilon_4$<br>( $\epsilon_3/\epsilon_4,$<br>$\epsilon_4/\epsilon_4$ )                        | O        | O  | O        | $\Delta$ |  |   |   |
| Serra-<br>Grabulosa<br>(2003)*(84) | Spain       | mean 65.5     | 50/14                  | $\epsilon_2/\epsilon_3$                        | $\epsilon_3/\epsilon_3$ and $\epsilon_4$<br>( $\epsilon_2/\epsilon_4,$<br>$\epsilon_3/\epsilon_4, \epsilon_4/\epsilon_4$ ) | NS       | NS |          | NS       |  |   |   |
| Chiang<br>(2012)(114)              | USA         | 68 (49-90)    | 37/19                  | $\epsilon_2/\epsilon_3$                        | $\epsilon_3/\epsilon_3$                                                                                                    |          |    |          |          |  | O |   |
| Groot<br>(2018)(90)                | Netherlands | Mean 69.2     | 180/36                 | $\epsilon_2/\epsilon_3$                        | $\epsilon_3/\epsilon_3$ and $\epsilon_4$<br>( $\epsilon_3/\epsilon_4,$<br>$\epsilon_4/\epsilon_4$ )                        | $\Delta$ |    |          |          |  |   | X |
| Chen<br>(2015)(124)                | China       | 69.3 in e2 HC | 100/16<br><i>in HC</i> | $\epsilon_2/\epsilon_3$                        | $\epsilon_3/\epsilon_3$ and $\epsilon_4$<br>( $\epsilon_3/\epsilon_4,$<br>$\epsilon_4/\epsilon_4$ )                        |          |    | $\Delta$ |          |  |   |   |

|                          |                                          |                                    |                     |                                                                                                                                                                                                                              |                                                                                                      |  |  |           |                            |  |  |  |
|--------------------------|------------------------------------------|------------------------------------|---------------------|------------------------------------------------------------------------------------------------------------------------------------------------------------------------------------------------------------------------------|------------------------------------------------------------------------------------------------------|--|--|-----------|----------------------------|--|--|--|
|                          |                                          | 64.8 in e2<br>aMCI                 | 85/9 in<br>aMCI     | $\epsilon_2/\epsilon_3$                                                                                                                                                                                                      | $\epsilon_3/\epsilon_3$ and $\epsilon_4$<br>( $\epsilon_3/\epsilon_4$ ,<br>$\epsilon_4/\epsilon_4$ ) |  |  | <b>O</b>  |                            |  |  |  |
| Den Heijer<br>(2002)(88) | Netherlands<br>(Rotterdam<br>Scan Study) | aged 60-90;<br>mean age 72, 7      | 949/12<br>0         | $\epsilon_2/\epsilon_2$ , $\epsilon_2/\epsilon_3$                                                                                                                                                                            | $\epsilon_3/\epsilon_3$                                                                              |  |  | <b>NS</b> | <b>NS</b>                  |  |  |  |
| Fan<br>(2010)(89)        | USA<br>(ADNI<br>)                        | mean 74.45,<br>5.97 in e2<br>group | 164/21              | $\epsilon_2/\epsilon_2$ , $\epsilon_2/\epsilon_3$                                                                                                                                                                            | $\epsilon_3/\epsilon_3$ and $\epsilon_4$<br>( $\epsilon_3/\epsilon_4$ ,<br>$\epsilon_4/\epsilon_4$ ) |  |  | <b>O</b>  |                            |  |  |  |
| Hostage<br>(2013)(87)    | USA<br>(ADNI<br>)                        | Mean 75.2 in<br>HC                 | 198/26<br>in HC     | 0 $\epsilon_2$ ( $\epsilon_3/\epsilon_3$ , $\epsilon_3/\epsilon_4$ , $\epsilon_4/\epsilon_4$ )<br>vs. 1 $\epsilon_2$ ( $\epsilon_2/\epsilon_3$ , $\epsilon_2/\epsilon_4$ ) vs. 2<br>$\epsilon_2$ ( $\epsilon_2/\epsilon_2$ ) |                                                                                                      |  |  |           | <b><math>\Delta</math></b> |  |  |  |
|                          |                                          | Mean 76.9 in<br>MCI                | 321/14<br>in<br>MCI | 0 $\epsilon_2$ ( $\epsilon_3/\epsilon_3$ , $\epsilon_3/\epsilon_4$ , $\epsilon_4/\epsilon_4$ )<br>vs. 1 $\epsilon_2$ ( $\epsilon_2/\epsilon_3$ , $\epsilon_2/\epsilon_4$ ) vs. 2<br>$\epsilon_2$ ( $\epsilon_2/\epsilon_2$ ) |                                                                                                      |  |  |           | <b>NS</b>                  |  |  |  |

|                 |                                            |                                    |        |                                                                                                                                                                                                               |                                                                                                                    |  |  |    |  |   |  |
|-----------------|--------------------------------------------|------------------------------------|--------|---------------------------------------------------------------------------------------------------------------------------------------------------------------------------------------------------------------|--------------------------------------------------------------------------------------------------------------------|--|--|----|--|---|--|
|                 |                                            | Mean 75.5 in AD                    | 143/4  | 0 $\epsilon_2$ ( $\epsilon_3/\epsilon_3, \epsilon_3/\epsilon_4, \epsilon_4/\epsilon_4$ ) vs. 1 $\epsilon_2$ ( $\epsilon_2/\epsilon_3, \epsilon_2/\epsilon_4$ ) vs. 2 $\epsilon_2$ ( $\epsilon_2/\epsilon_2$ ) |                                                                                                                    |  |  | NS |  |   |  |
| Khan (2017)(85) | Multi cohort (AD and normal aging dataset) | Mean 75.8 in HC                    | 375/17 | $\epsilon_2/\epsilon_3, \epsilon_2/\epsilon_3$                                                                                                                                                                | $\epsilon_3/\epsilon_3$ and $\epsilon_4$ ( $\epsilon_3/\epsilon_4, \epsilon_4/\epsilon_4$ )                        |  |  | NS |  |   |  |
|                 |                                            | Mean 75.6 in MCI                   | 522/29 | $\epsilon_2/\epsilon_3, \epsilon_2/\epsilon_3$                                                                                                                                                                | $\epsilon_3/\epsilon_3$ and $\epsilon_4$ ( $\epsilon_3/\epsilon_4, \epsilon_4/\epsilon_4$ )                        |  |  | NS |  |   |  |
|                 |                                            | Mean 78.1 in AD                    | 512/66 | $\epsilon_2/\epsilon_3, \epsilon_2/\epsilon_3$                                                                                                                                                                | $\epsilon_3/\epsilon_3$ and $\epsilon_4$ ( $\epsilon_3/\epsilon_4, \epsilon_4/\epsilon_4$ )                        |  |  | NS |  |   |  |
| Lim (2017)(96)  | USA (ADNI )                                | mean age 75.9 for AB+ $\epsilon_2$ | 595/59 | $\epsilon_2/\epsilon_2, \epsilon_2/\epsilon_3$                                                                                                                                                                | $\epsilon_3/\epsilon_3$ and $\epsilon_4$ ( $\epsilon_2/\epsilon_4, \epsilon_3/\epsilon_4, \epsilon_4/\epsilon_4$ ) |  |  |    |  | O |  |

|                              |                                  |                                  |                                |                                                |                                                                                                     |  |  |           |          |          |  |          |
|------------------------------|----------------------------------|----------------------------------|--------------------------------|------------------------------------------------|-----------------------------------------------------------------------------------------------------|--|--|-----------|----------|----------|--|----------|
| Conejero-Goldberg (2014)(21) | USA (ADNI)                       | Mean age 75                      | 31/5                           | $\epsilon_2/\epsilon_2, \epsilon_2/\epsilon_3$ | $\epsilon_3/\epsilon_3$ and $\epsilon_4$<br>( $\epsilon_3/\epsilon_4,$<br>$\epsilon_4/\epsilon_4$ ) |  |  | $\Delta$  |          |          |  |          |
| Grothe (2017)(97)            | USA (ADNI)                       | mean age 73.0<br>in $\epsilon_2$ | 572<br>HC<br>and<br>MCI/5<br>0 | $\epsilon_2/\epsilon_3$                        | $\epsilon_3/\epsilon_3$                                                                             |  |  |           |          | <b>O</b> |  |          |
| Gong (2020)(80)              | USA (ADNI)                       | Mean 72.05                       | 177/32                         | $\epsilon_2/\epsilon_2, \epsilon_2/\epsilon_3$ | $\epsilon_3/\epsilon_3$ and $\epsilon_4$<br>( $\epsilon_3/\epsilon_4,$<br>$\epsilon_4/\epsilon_4$ ) |  |  | <b>NS</b> | <b>O</b> |          |  |          |
| Luo (2017)(108)              | USA (ADNI)                       | 74                               | 178/34                         | $\epsilon_2/\epsilon_2, \epsilon_2/\epsilon_3$ | $\epsilon_3/\epsilon_3$ and<br>$\epsilon_3/\epsilon_4$                                              |  |  |           |          |          |  | <b>X</b> |
| Kantarci (2012)(82)          | USA (Mayo Clinic Study of Aging) | 79 (76-83)                       | 51/408                         | $\epsilon_2/\epsilon_2, \epsilon_2/\epsilon_3$ | $\epsilon_3/\epsilon_3$ and $\epsilon_4$<br>( $\epsilon_3/\epsilon_4,$<br>$\epsilon_4/\epsilon_4$ ) |  |  |           |          | <b>O</b> |  |          |

| Longitudinal Findings  |                 |              |                                 |                   |                                                                       |                                                                       |          |            |          |             |           |           |     |
|------------------------|-----------------|--------------|---------------------------------|-------------------|-----------------------------------------------------------------------|-----------------------------------------------------------------------|----------|------------|----------|-------------|-----------|-----------|-----|
| Study                  | Population      | F/U Duration | Participant Age at Baseline (y) | N/ $\epsilon 2$ n | Predictor                                                             | Comparisons                                                           | Cortical | Ventricles | Regional | Hippocampal | Amyloid B | FA and MD | WMH |
| Roe (2018)(91)         | USA             | 6.2 y        | 42-90 (mean 67.6)               | 664/82            | $\epsilon 2/\epsilon 2, \epsilon 2/\epsilon 3, \epsilon 2/\epsilon 4$ | $\epsilon 3/\epsilon 3, \epsilon 3/\epsilon 4, \epsilon 4/\epsilon 4$ |          |            |          |             | O         |           |     |
| Chiang (2010)(93)      | USA (ADNI)      | 2y           | 55-90; mean 79 SD 4.6           | 134/27            | $\epsilon 2/\epsilon 2, \epsilon 2/\epsilon 3$                        | $\epsilon 3/\epsilon 3$                                               | O        |            |          | O           |           |           |     |
| Kim et al. (2017)(100) | S. Korea *      | 3 y          | 73+                             |                   | $\epsilon 2/\epsilon 2, \epsilon 2/\epsilon 3$                        | $\epsilon 3/\epsilon 3$                                               | O        |            |          |             | O         |           |     |
| Hall (2019)(99)        | Finland (Vanta) | 5.6 y        | 85+; Healthy at baseline        | 163/26            | $\epsilon 2/\epsilon 2, \epsilon 2/\epsilon 3, \epsilon 2/\epsilon 4$ | $\epsilon 3/\epsilon 3, \epsilon 3/\epsilon 4, \epsilon 4/\epsilon 4$ |          |            |          |             | O         |           | X   |
